# Supplementary material for: A Multidisciplinary Approach in Examining the Susceptibility to Microbial Attack of Polyacrylic and Polyurethane Resins Used in Art Restoration
Source: MDPI journal article supplement (doi:10.3390/ijms231911725), 2022-10-03

**Supplementary Figure S1.** FT-IR spectra of polyacrylic resins. AC 012, AC 013 and AC P1 controls spectra (a, b, c) and AC 012, AC 013 and AC P1 spectra after 7 days of incubation with fungi (d, e, f).

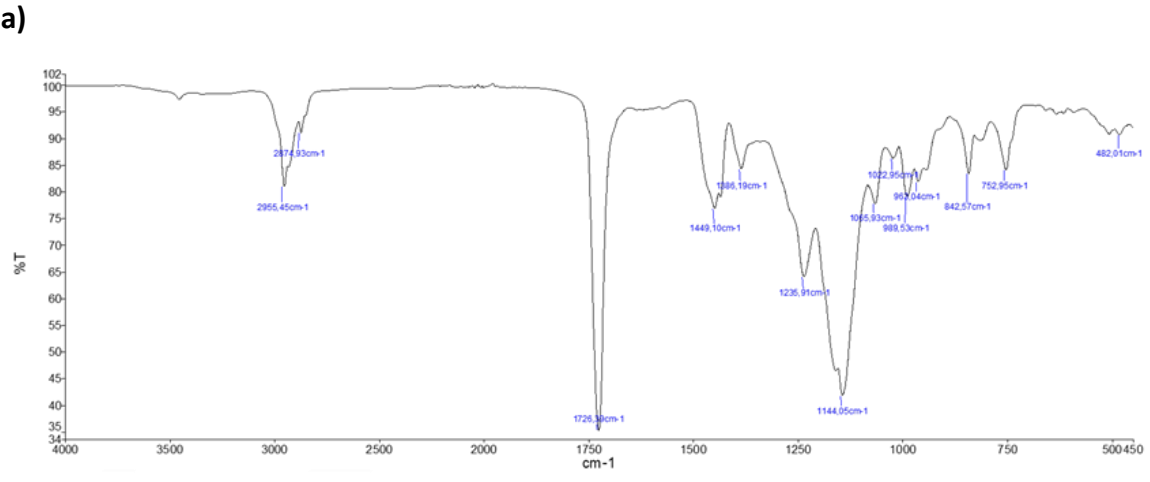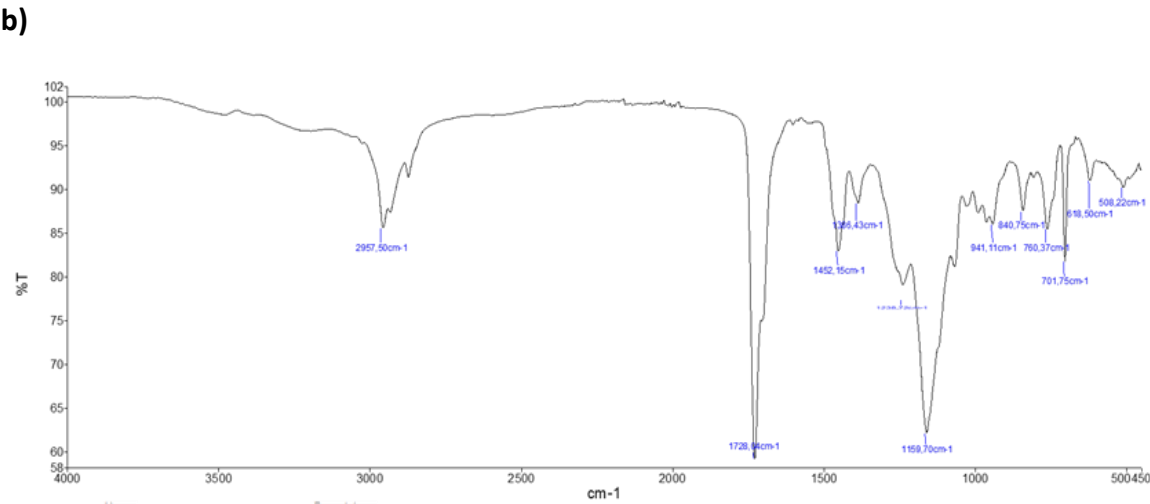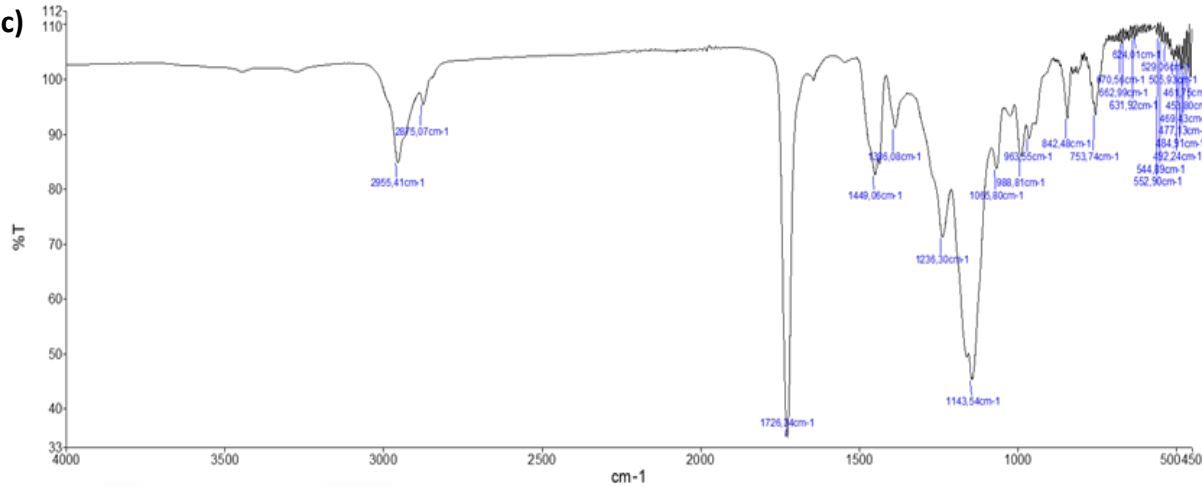

d)

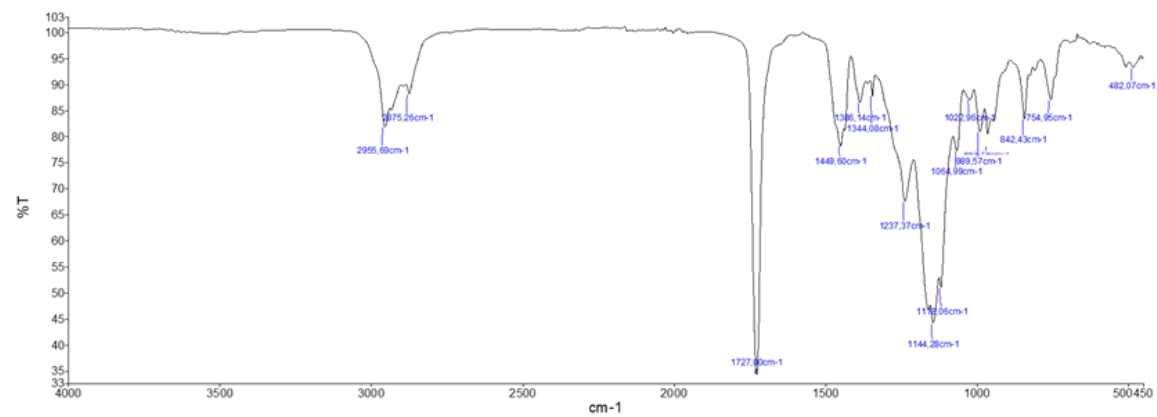

e)

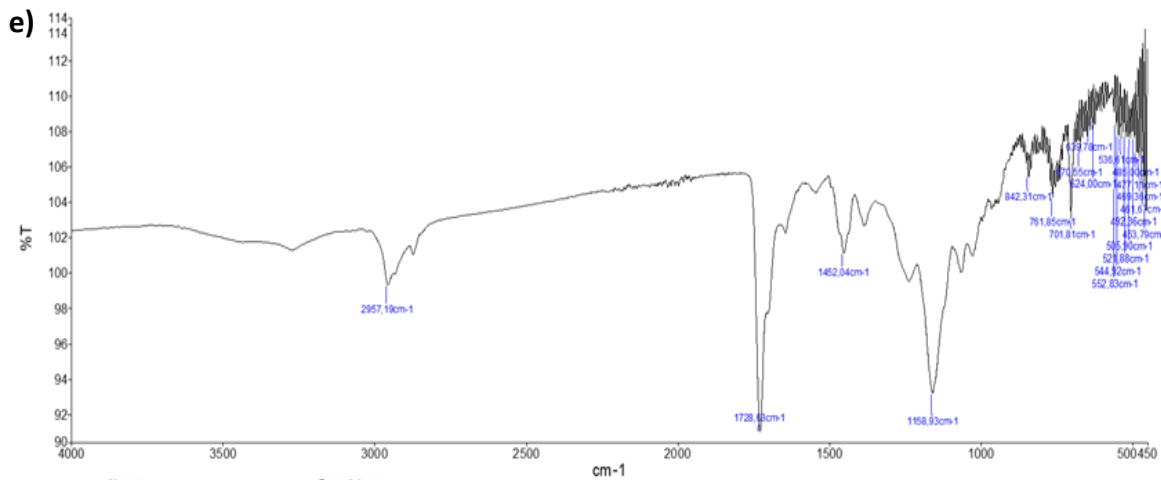

f)

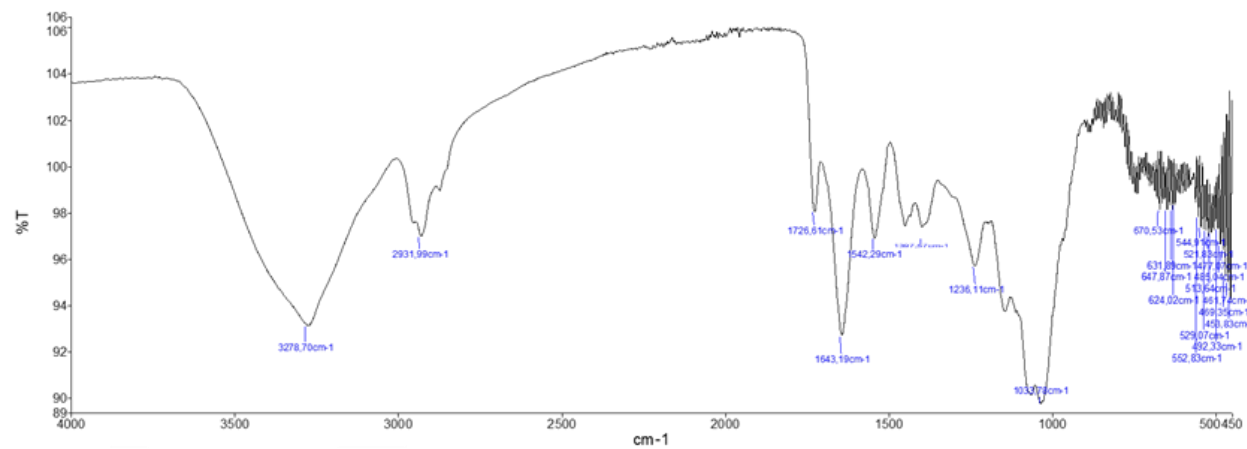

**Supplementary Figure S2.** FT-IR spectra of polyacrylic resins AC 012, AC 013, AC P1 and AC 32 after incubation with *P. aeruginosa* ATCC 9027.

AC 012

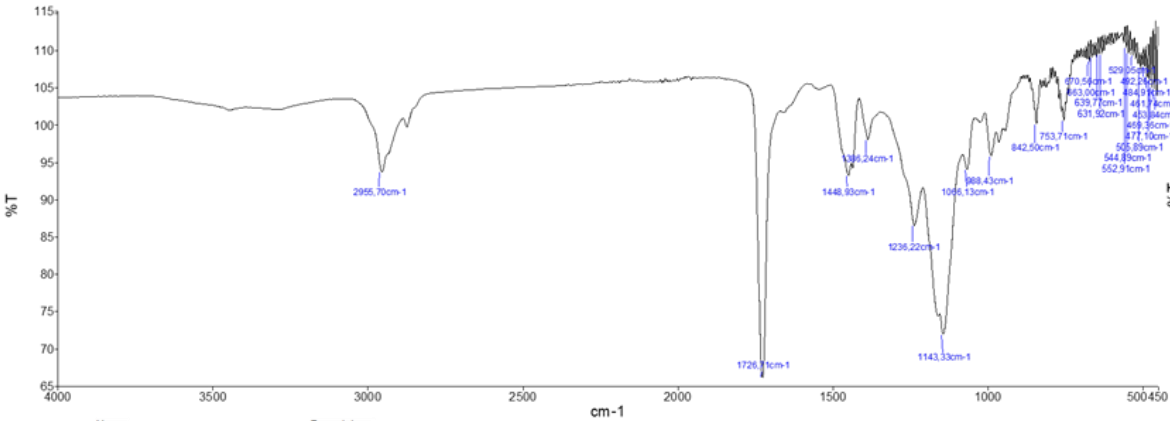

AC 013

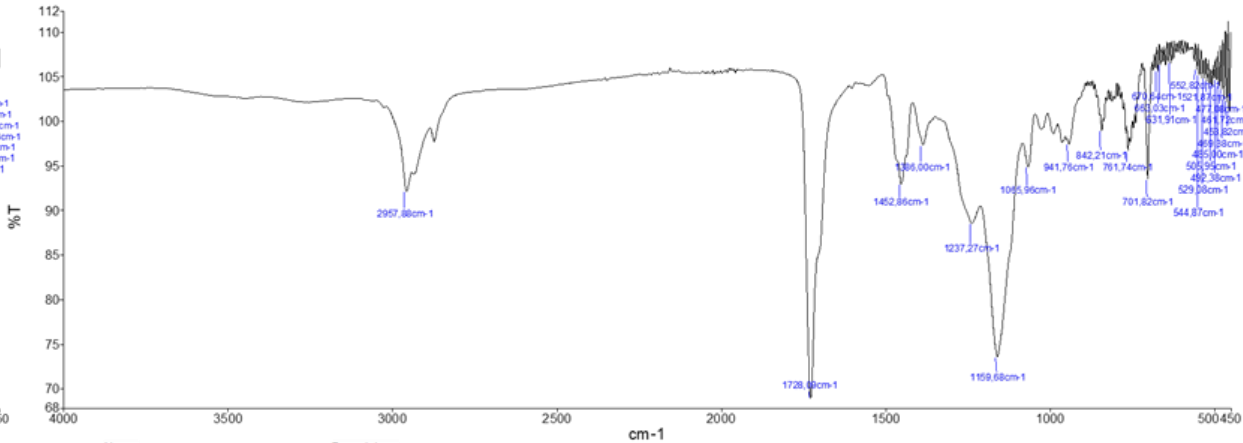

AC P1

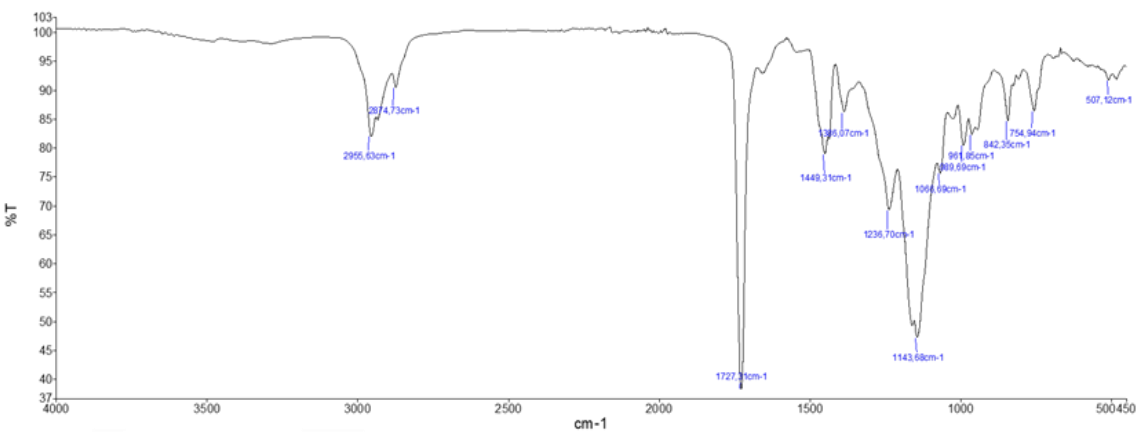

AC 32

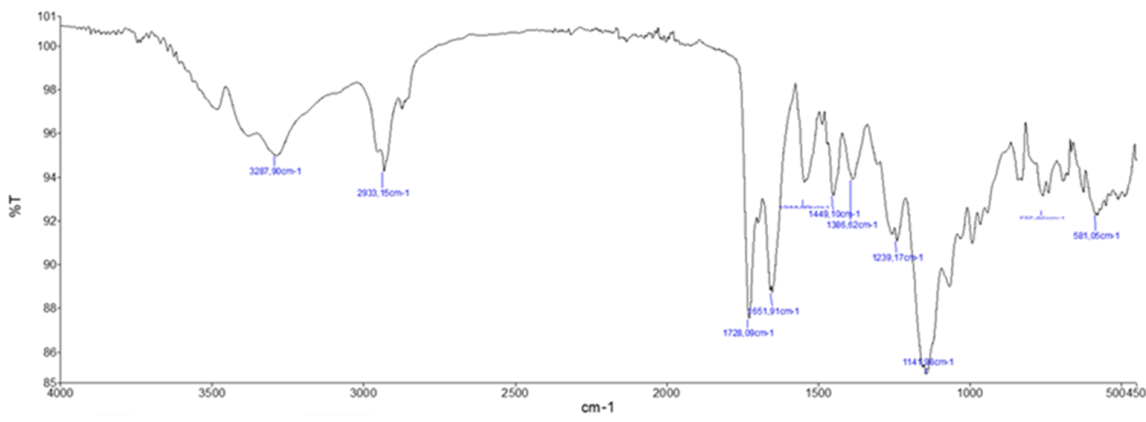

**Supplementary Figure S3.** FT-IR spectra of polyurethane resins. PU H6 and PU GS controls spectra (a, b) and PU H6 and PU GS spectra after 7 days of incubation with fungi (c, d).

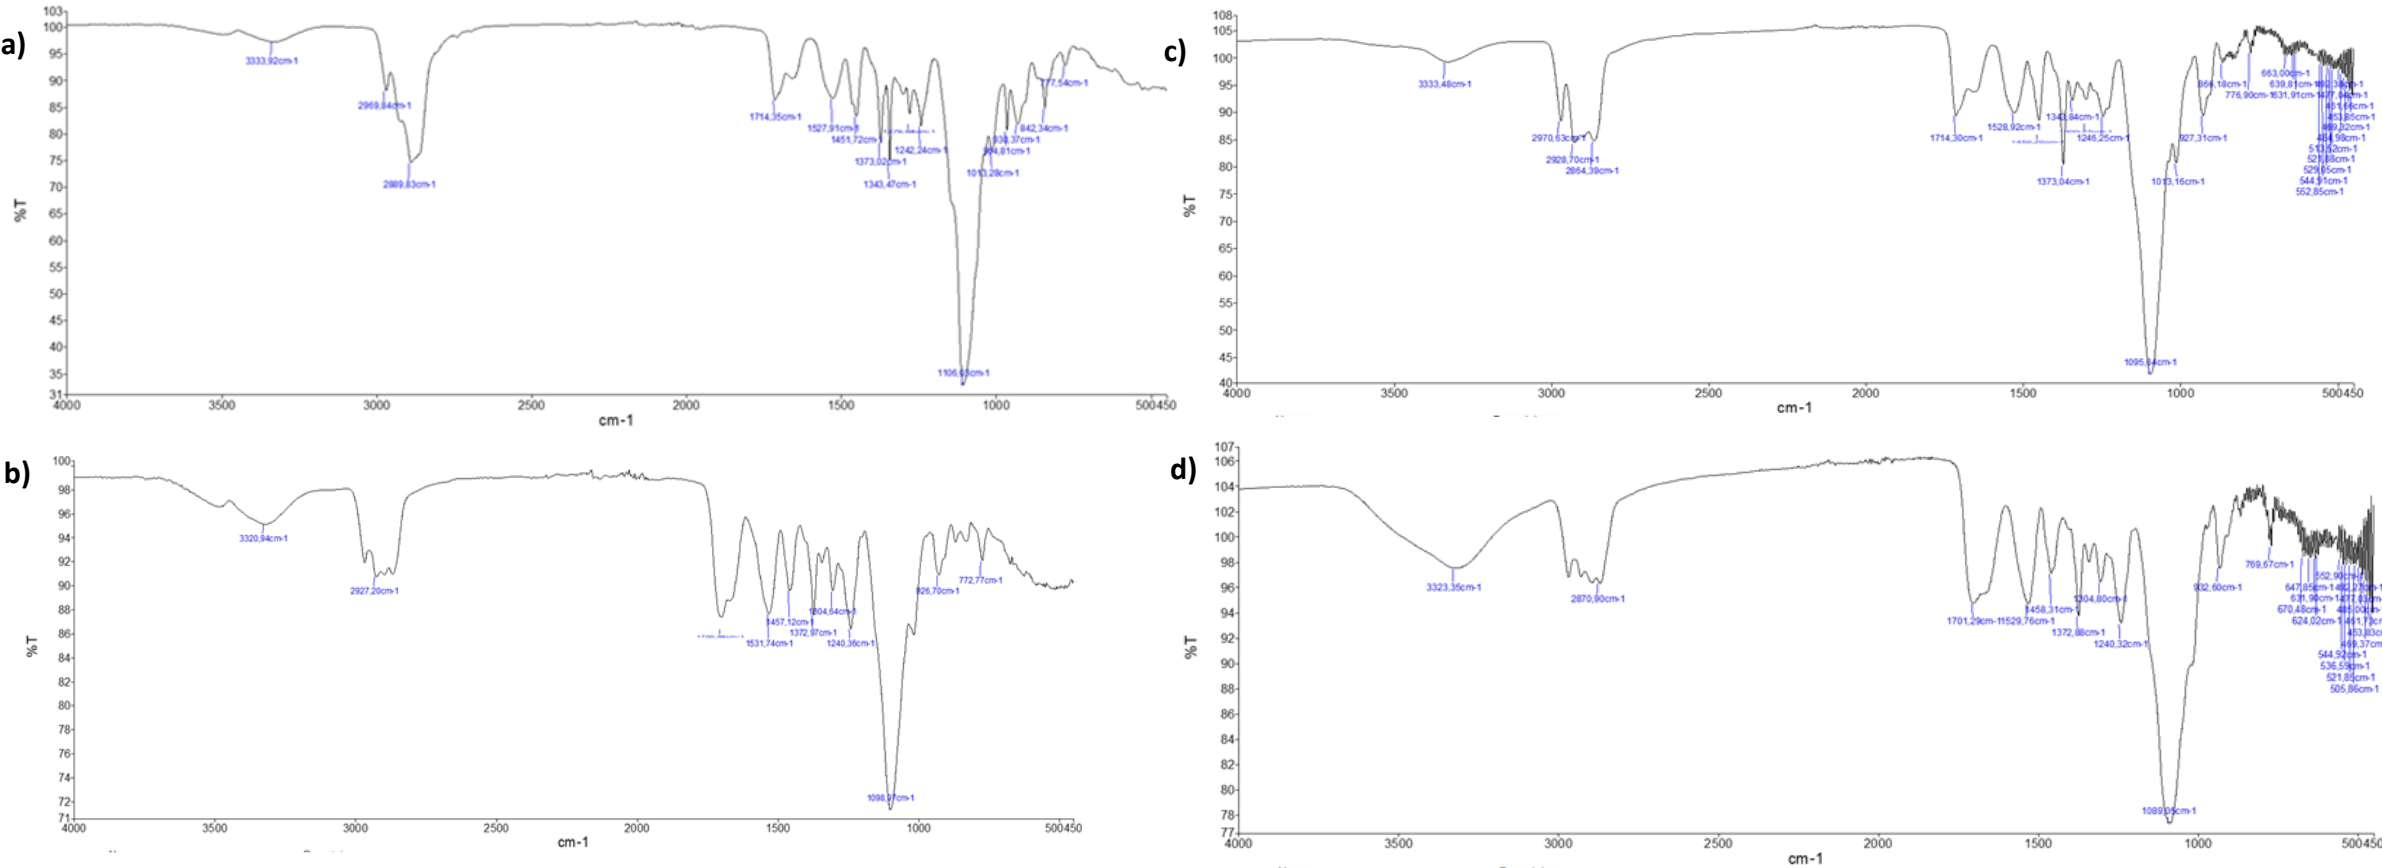

**Supplementary Figure S4.** FT-IR spectra of polyurethane resin PU GS after incubation with *P. aeruginosa* ATCC 9027.

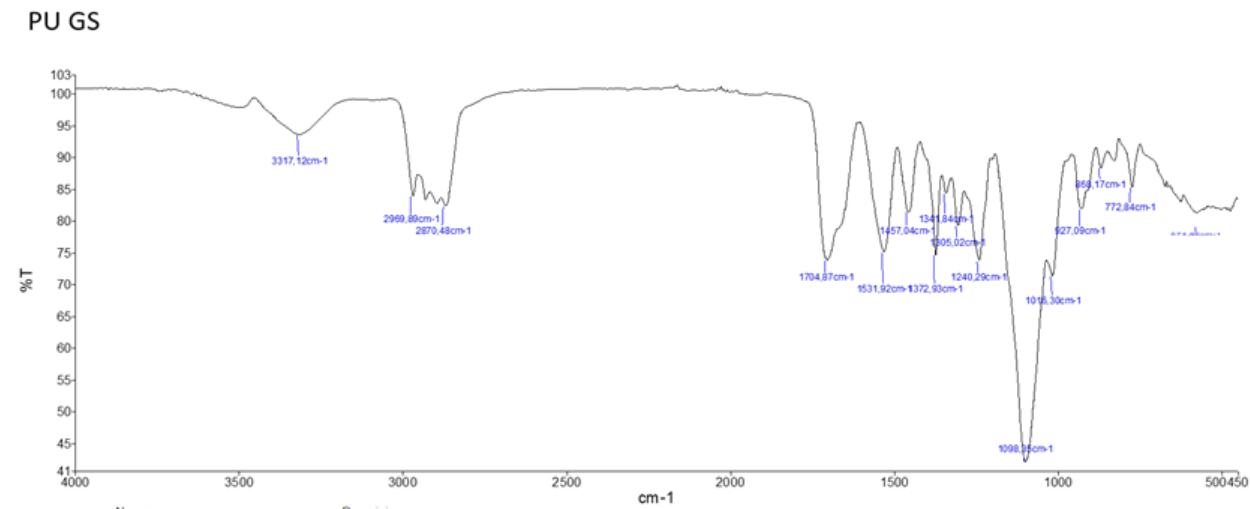

Supplement: s1 [file s1]
